# Supplementary material for: An electrochemiluminescence immunosensor based on multipath signal catalytic amplification integrated in a Cu2+–PEI–Pt/AuNC nanocomposite
Source: Royal Society of Chemistry journal article supplement (doi:10.1039/d3an00721a), 2023-01-01
Supplement: d3an00721a1.pdf [file d3an00721a1.pdf]

## Supporting Information

### **Electrochemiluminescence immunosensor based on multipath signal catalytic amplification integrated in Cu<sup>2+</sup>-PEI-Pt/AuNCs nanocomposite**

**Haijun Wang\*, Yuhang Song, Yaqin Chai, Ruo Yuan\***

*Key Laboratory of Luminescence Analysis and Molecular Sensing (Southwest University), Ministry of Education, College of Chemistry and Chemical Engineering, Southwest University, Chongqing, 400715, PR China*

**Reagents and apparatus.**  $\beta$ 2-Microglobulin ( $\beta$ 2-MG), Carcinoembryonic antigen (CEA),  $\alpha$ -1-fetoprotein (AFP) and its antibody were purchased from Biocell Company (Zhengzhou, China). Trisodium citrate ( $\text{Na}_3\text{C}_6\text{H}_5\text{O}_7$ ) was got from J&K Scientific Ltd. (Beijing, China). Chloroplatinic acid ( $\text{H}_2\text{PtCl}_6$ ), Chlorauric acid ( $\text{HAuCl}_4$ ), bovine serum albumin (BSA) and hydrogen peroxide ( $\text{H}_2\text{O}_2$ ) were bought from Sigma-Aldrich (St. Louis, MO, USA). Phosphate-buffered solution (PBS) prepared by  $\text{KH}_2\text{PO}_4$  (0.1 M),  $\text{Na}_2\text{HPO}_4$  (0.1 M) and KCl (0.1 M) (pH 7.4, 0.1 M) was used in the this work. The human serum samples were obtained from Southwest Hospital in chongqing.

MPI-E ECL analyzer used for the ECL measurement in this work was obtained from Xi'an Remax Electronic science & Technology Co.Ltd. (potential scanning range: -2~0 V, photomultiplier tube: 800 V). The three-electrode system consist of the modified glassy carbon electrode (GCE, working electrode), Ag/AgCl (sat. KCl, reference electrode) and

---

\*Corresponding author. Tel.: +86 23 68252277; fax: +86 23 68253172

E-mail addresses: hjwang@swu.edu.cn (H.J. Wang), yuanruo@swu.edu.cn (R. Yuan)

platinum wire (counter electrode) and was used in ECL detection. The scanning electron microscopy (SEM, S-4800, Hitachi, Japan) and X-ray photoelectron spectroscopy (XPS) and were used for characterization of nanomaterials.

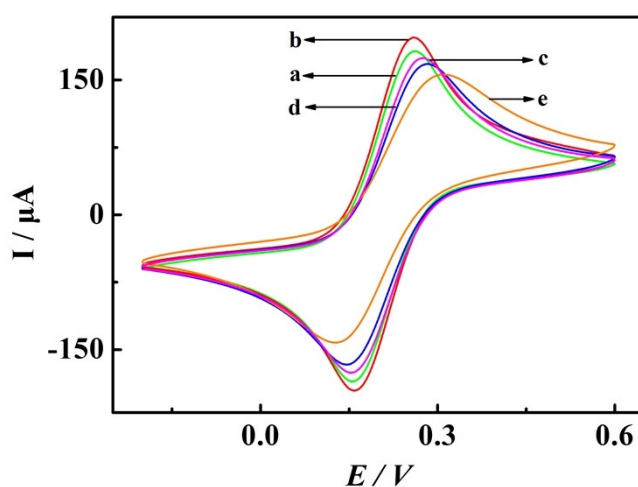

**Fig. S1.** CVs curves of bare (a) GCE, (b) GCE/AuNPs, (c) GCE/AuNPs/Ab, (d) GCE/AuNPs/Ab/BSA, (e) GCE/AuNPs/Ab/BSA/AFP in 5 mM  $[\text{Fe}(\text{CN})_6]^{3-/4-}$ .

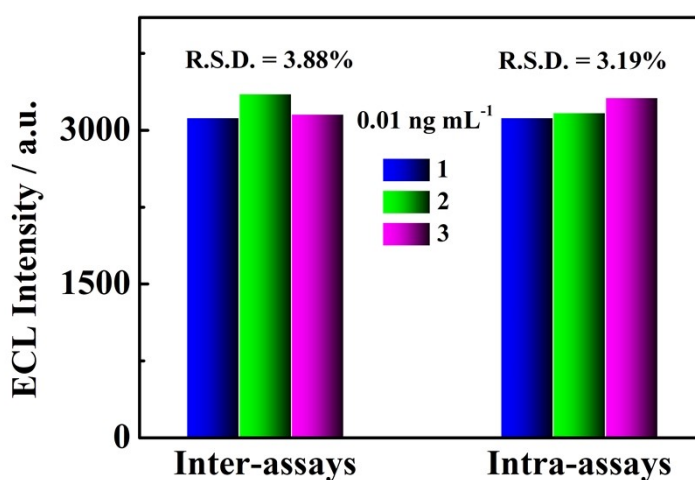

**Fig. S2.** The reproducibility of intra- and inter-assays
